# Supplementary material for: A new hematite photoanode doping strategy for solar water splitting: oxygen vacancy generation
Source: Royal Society of Chemistry journal article supplement (doi:10.1039/c2cp44352j), 2012-12-05
Supplement: c2cp44352j.pdf [file c2cp44352j.pdf]

# Supporting Information

## **New Doping Strategy in Hematite Photoanode for Solar Water Splitting: Oxygen Vacancy Generation**

Tae-Youl Yang, Ho-Young Kang, Uk Sim, Young-Joo Lee, Ji-Hoon Lee, Byungjin Koo, Ki Tae Nam,<sup>\*</sup> and Young-Chang Joo<sup>\*</sup>

Department of Materials Science and Engineering, Seoul National University, Gwanak-ro 1,  
Gwanak-gu, Seoul 151-744, Republic of Korea

**\*Corresponding author:**

**Prof. Young-Chang Joo**

**E-mail:** ycjoo@snu.ac.kr

**Seoul National University, Korea**

**Prof. Ki Tae Nam**

**E-mail:** nkitae@snu.ac.kr

**Seoul National University, Korea**

1. Preparation of hematite films

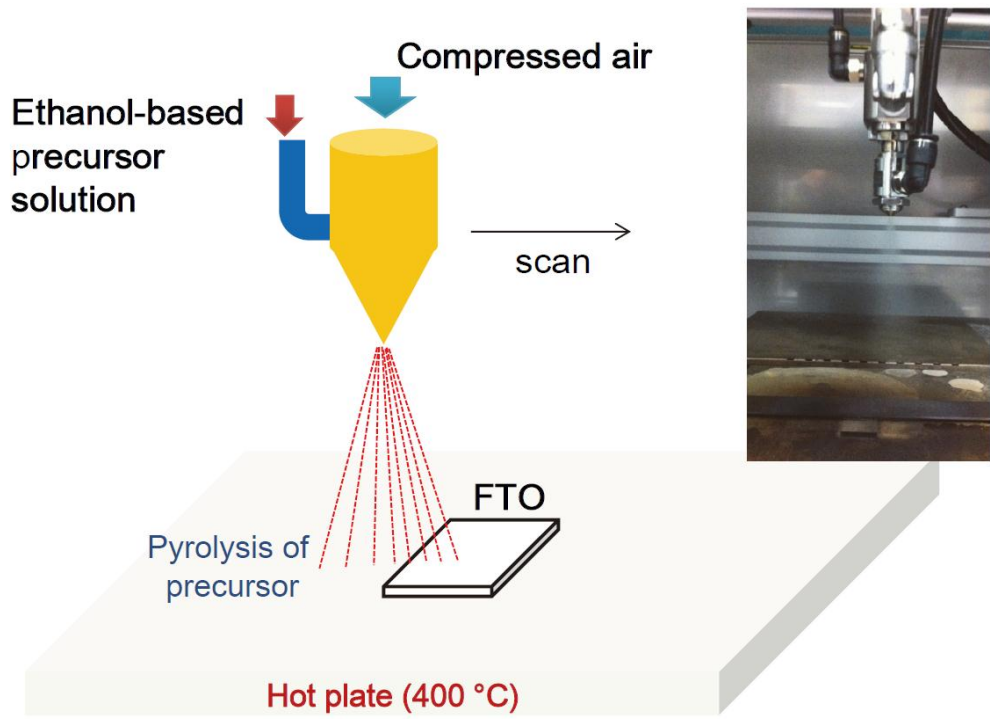

**Figure S1.** The aerosol spray pyrolysis (ASP) method for the preparation of hematite films.

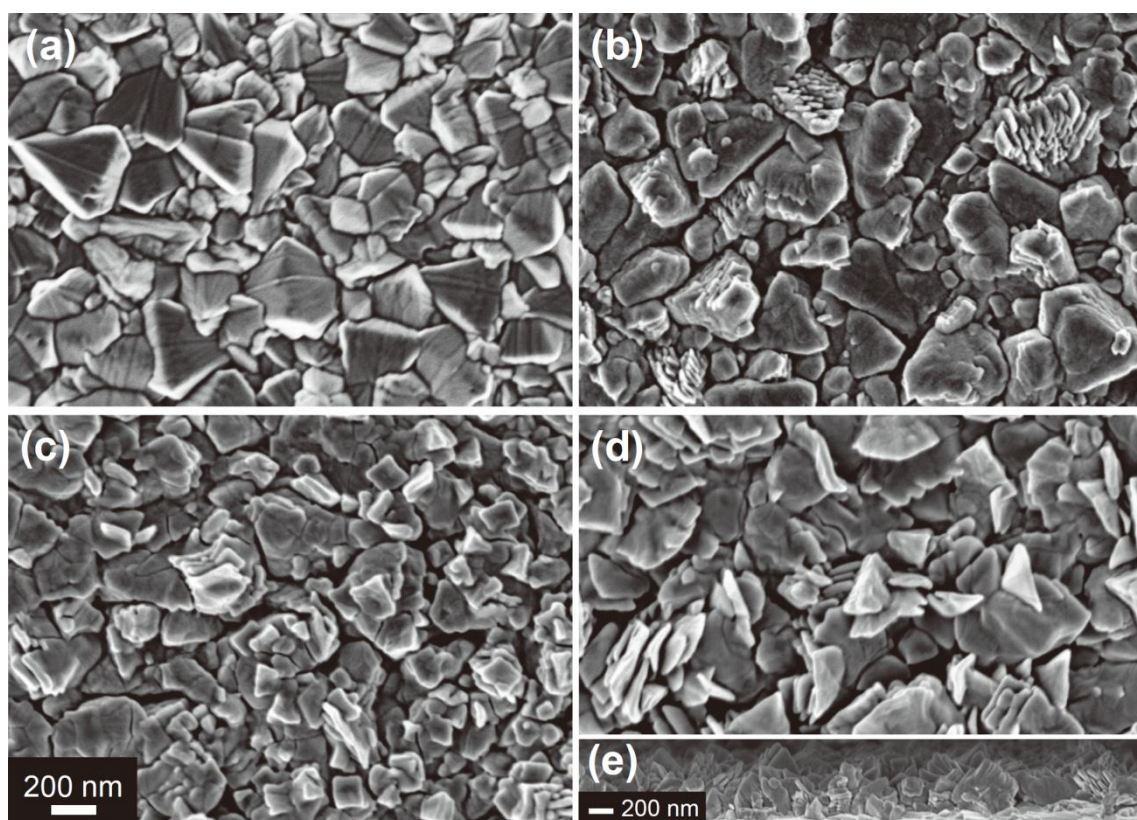

**Figure S2.** Scanning electron microscopy (SEM) images of (a) the FTO substrate and the hematite films formed by the spraying of an FeCl<sub>3</sub>-ethanol precursor solution with a volume of (b) 30 mL, (c) 60 mL, and (d) 90 mL. (e) Cross-sectional SEM of hematite films formed by the spraying of the 90mL-solution.

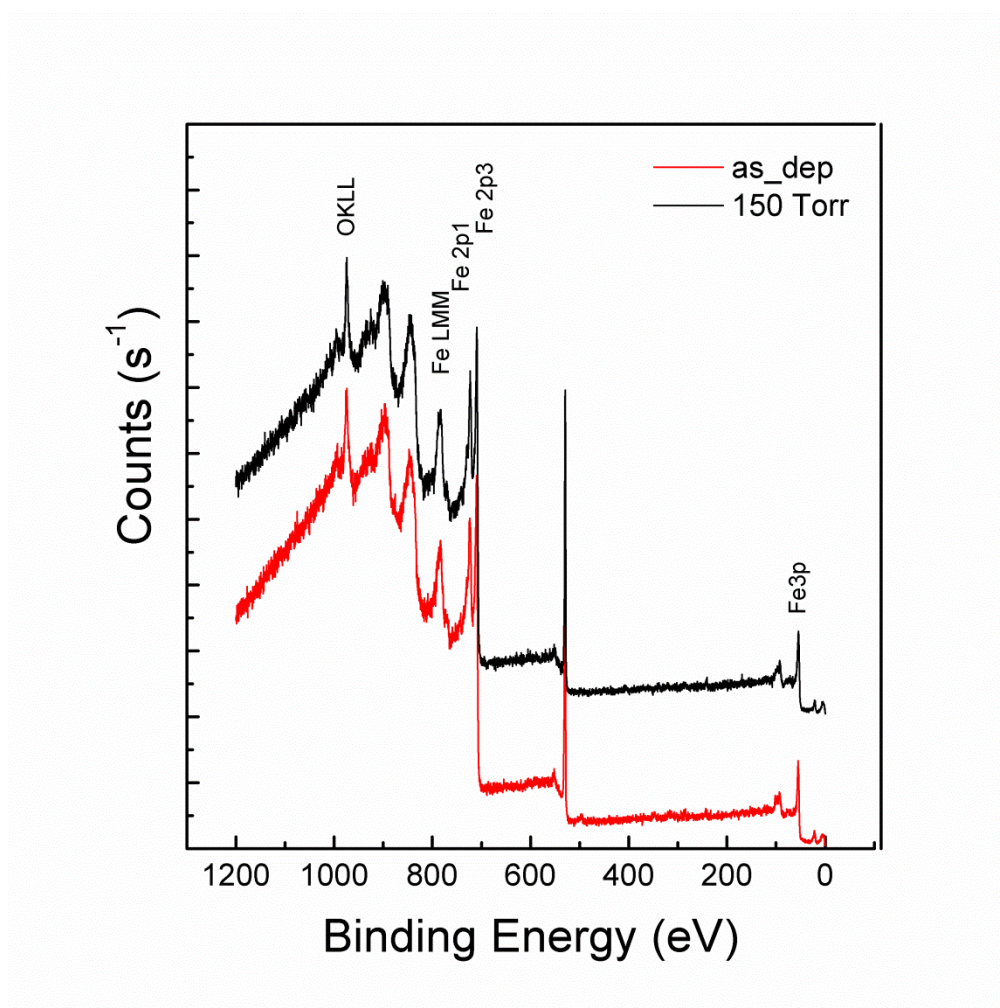

**Figure S3.** X-ray photoelectron spectroscopy (XPS) spectra measured from the as-coated hematite (red) and from the hematite after thermal reduction and oxidative annealing at ambient air ( $pO_2 = 150$  Torr)(black).

## 2. Post annealing process

### Oxygen-partial-pressure-controlled annealing process

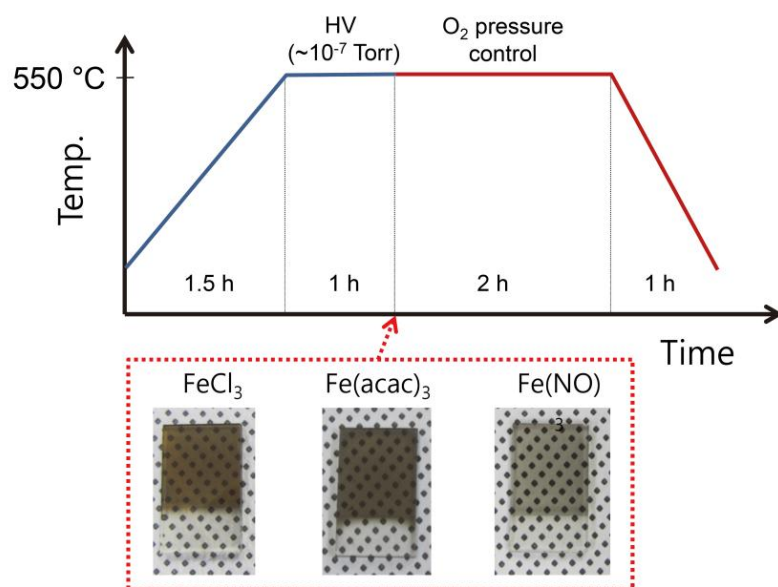

### Normal annealing process

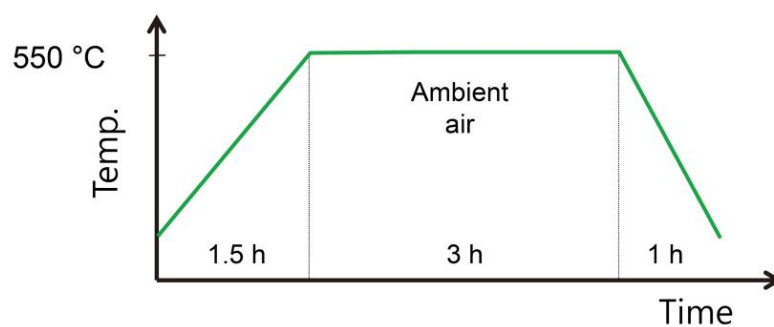

**Figure S4.** Annealing procedure and atmospheric conditions for oxygen-partial-pressure-controlled annealing and for normal annealing. Photographs for reduced magnetite films prepared from the different precursors and after HV annealing: ferric chloride (FeCl<sub>3</sub>), ferric acetylacetonate (Fe(acac)<sub>3</sub>), and ferric nitrate (Fe(NO<sub>3</sub>)<sub>3</sub>).



3. Measurement of photocurrent in hematite

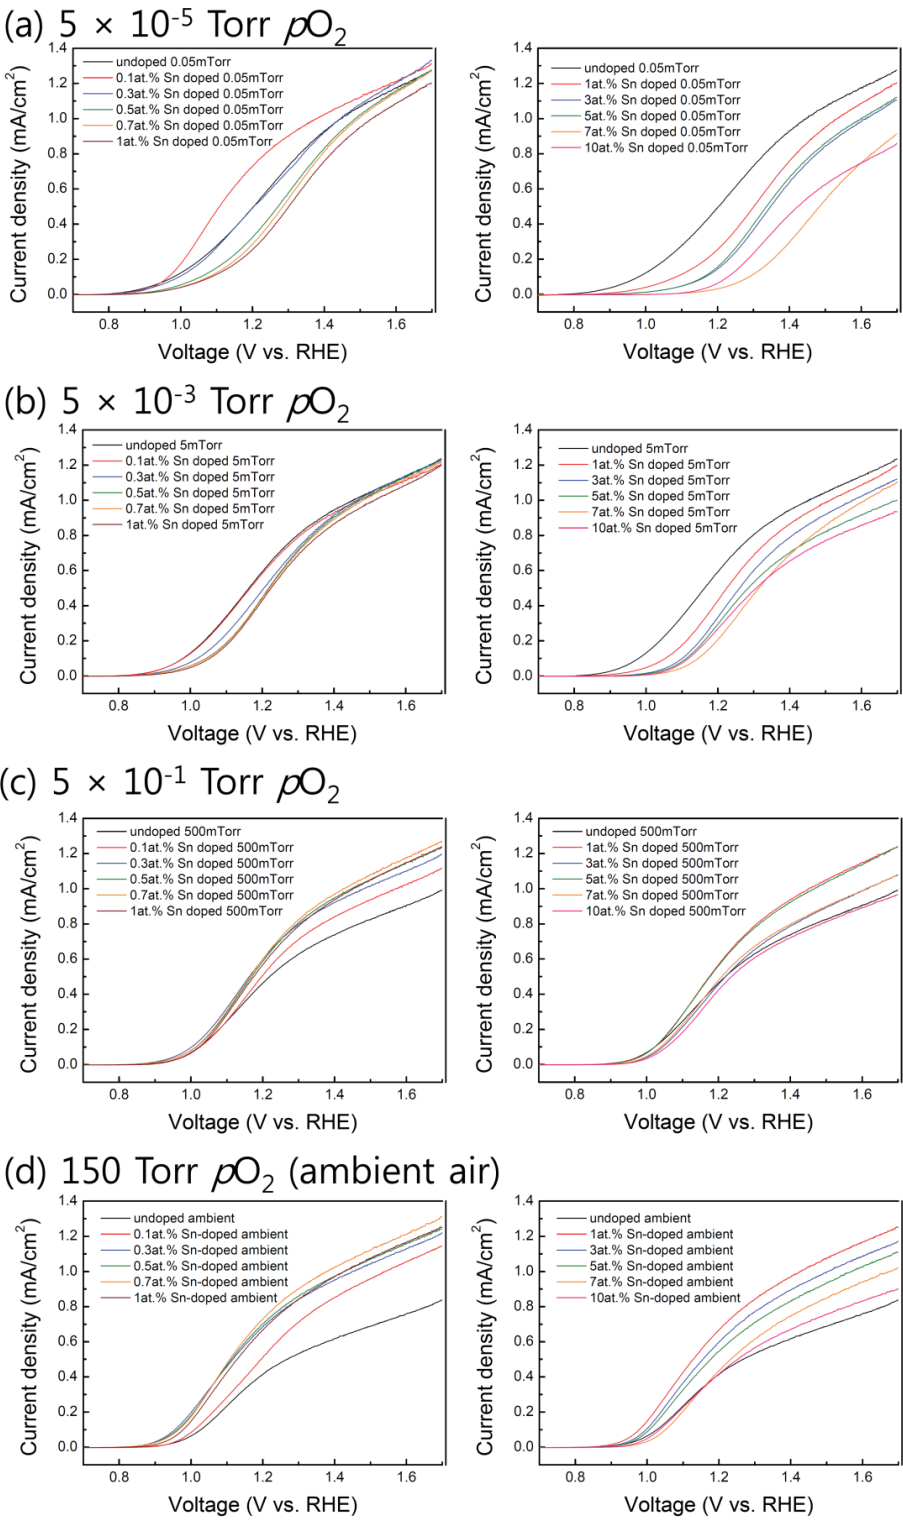

**Figure S5.** Photocurrent density–potential (J–V) curves for hematite films with different Sn-doping concentrations annealed under controlled oxygen partial pressures.

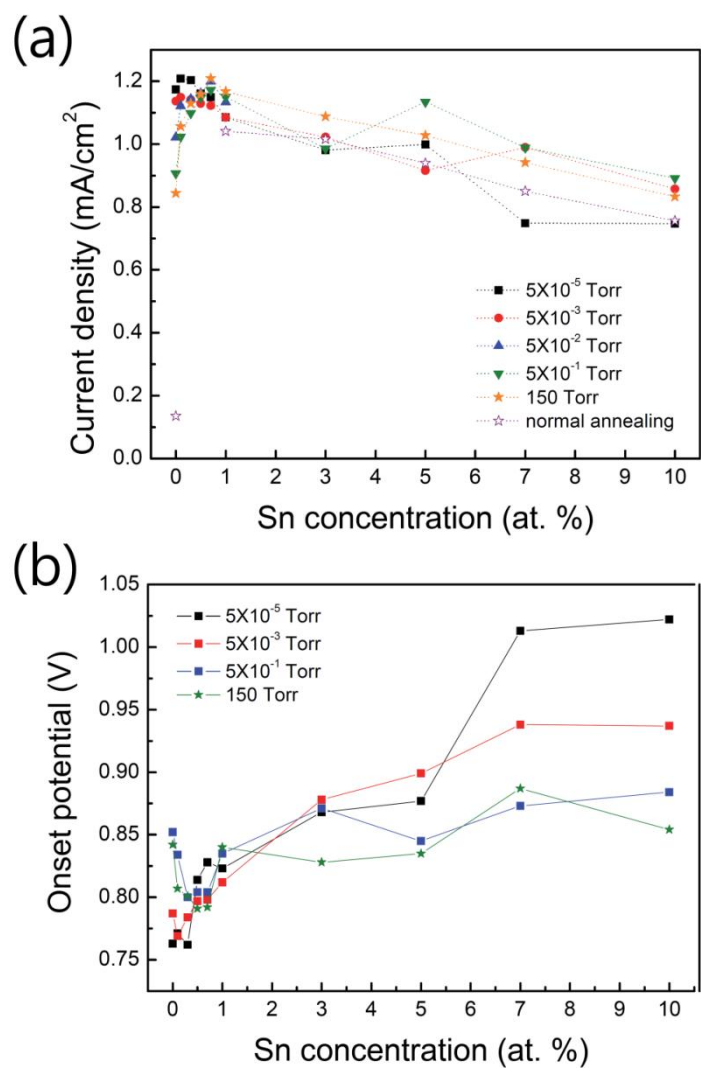

**Figure S6.** (a) Photocurrent density at 1.6 V vs. RHE. (b) Photocurrent onset potential for hematite films after  $p\text{O}_2$ -controlled annealing with various  $p\text{O}_2$  levels as a function of the doping concentration (0.1 at.% ~ 10 at. %).

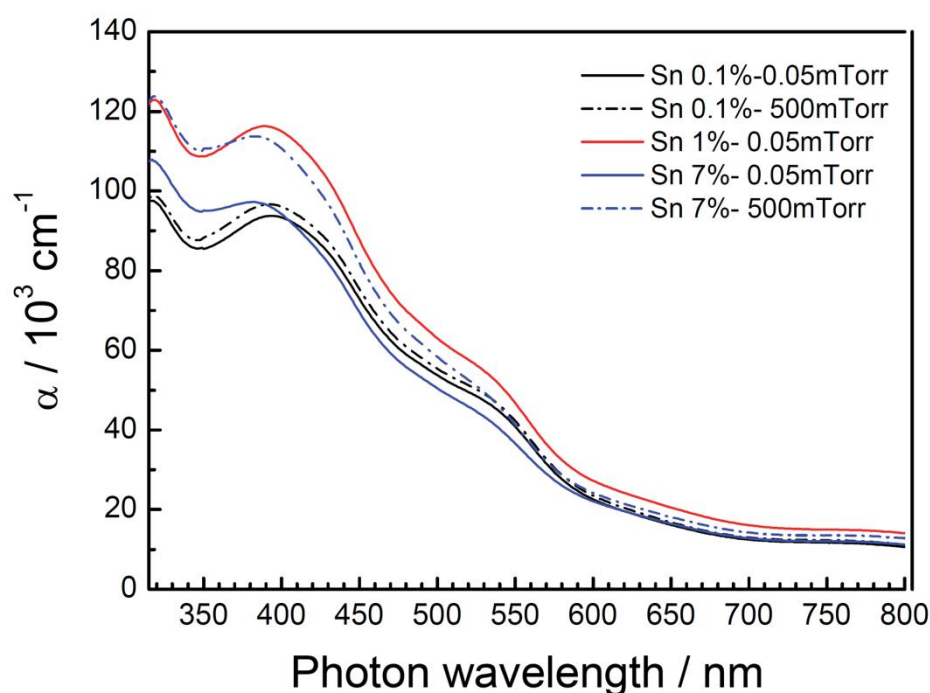

**Figure S7.** Optical property of hematite films in the various  $p\text{O}_2$  and Sn concentration, which shows the absorption coefficient as a function of wavelength. The optical property of hematite, absorption, did not affect the photoactivity in hematite. The absorption coefficient of 0.1% Sn-doped hematite was not changed by the ambient during the post-annealing (See solid black line and dash-dotted black line). Doping concentration has little influence on absorption. The peaks near 390 nm, which arise from a ligand-to-metal charge transfer ( $6t_{1u}\downarrow \rightarrow 2t_{2g}\downarrow$ ), are blue-shifted in the samples with higher Sn-concentration. Although 1 at.% Sn-doped sample shows the highest value of absorption coefficient, this can result from the difference in film thickness. Indeed, 7 at.% Sn-doped sample annealed at  $5 \times 10^{-1}$  Torr (dash-dotted blue line) shows the higher absorption coefficient than 0.1 at.% Sn-doped sample annealed at  $5 \times 10^{-1}$  Torr (dash-dotted black line), but the photocurrent density is higher in the 0.1 at.% Sn-doped hematite.



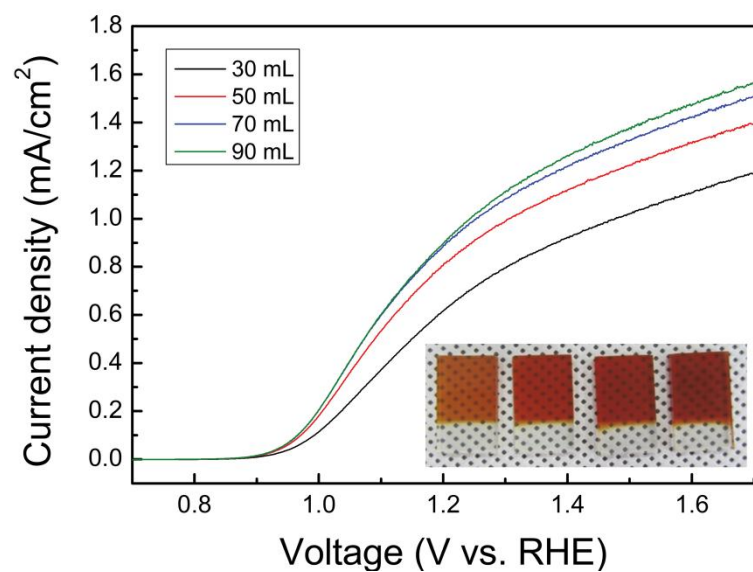

**Figure S8.** Photocurrent density–potential (J–V) curves for 1at.%-Sn-doped hematite film annealed at 150 Torr- $p\text{O}_2$  (ambient air) in various amount of precursor solution. Inset: photographs for hematite photoanode prepared by ASP using 30 mL, 50 mL, 70 mL, and 90 mL of precursor solution.
